# Supplementary material for: Highly stretchable porous regenerated silk fibroin film for enhanced wound healing
Source: Royal Society of Chemistry journal article supplement (doi:10.1039/d2tb01896a), 2023-01-01
Supplement: d2tb01896a1.pdf [file d2tb01896a1.pdf]

Supporting information:

## **Highly Stretchable Porous Regenerated Silk Fibroin Film for Enhanced Wound Healing**

*Fengchao Sun<sup>a, b</sup>, Dongdong Xiao<sup>c, d</sup>, Hui Su<sup>a, b</sup>, Zhiliang Chen<sup>a, b</sup>, Bijia Wang<sup>a, b</sup>,  
Xueling Feng<sup>a, b</sup>, Zhiping Mao<sup>a, b</sup>, Xiaofeng Sui<sup>a, b\*</sup>*

*<sup>a</sup> Key Lab of Science & Technology of Eco-Textile, Ministry of Education, College of  
Chemistry, Chemical Engineering and Biotechnology, Donghua University, Shanghai,  
201620, China*

*<sup>b</sup> Shanghai Belt and Road Joint Laboratory of Textile Intelligent Manufacturing,  
Shanghai, 201620, China*

*<sup>c</sup> Department of Urology, Ren Ji Hospital, School of Medicine, Shanghai Jiao Tong  
University, Shanghai, 200001, China*

*<sup>d</sup> Shanghai Key Laboratory of Tissue Engineering, Shanghai Ninth People's Hospital,  
School of Medicine, Shanghai Jiao Tong University, Shanghai, 200011, China*

*\*Corresponding authors:*

*E-mail: suixf@dhu.edu.cn (Xiaofeng Sui)*

*Address: No. 2999 North Renmin Road, Shanghai 201620, People's Republic of China.*

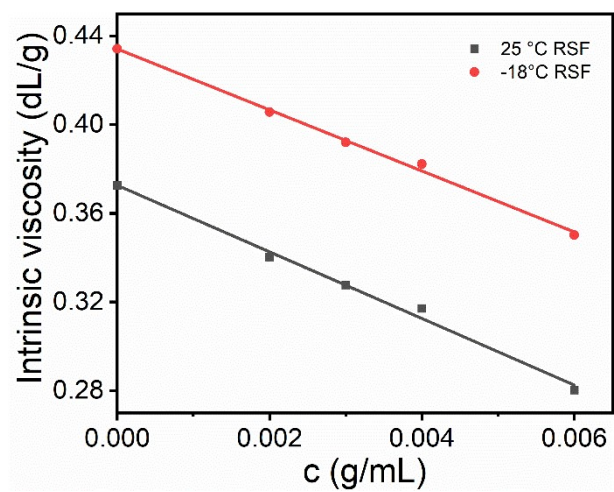

**Fig. S1.** The intrinsic viscosity of RSF prepared from aq. PA solutions at different temperatures.

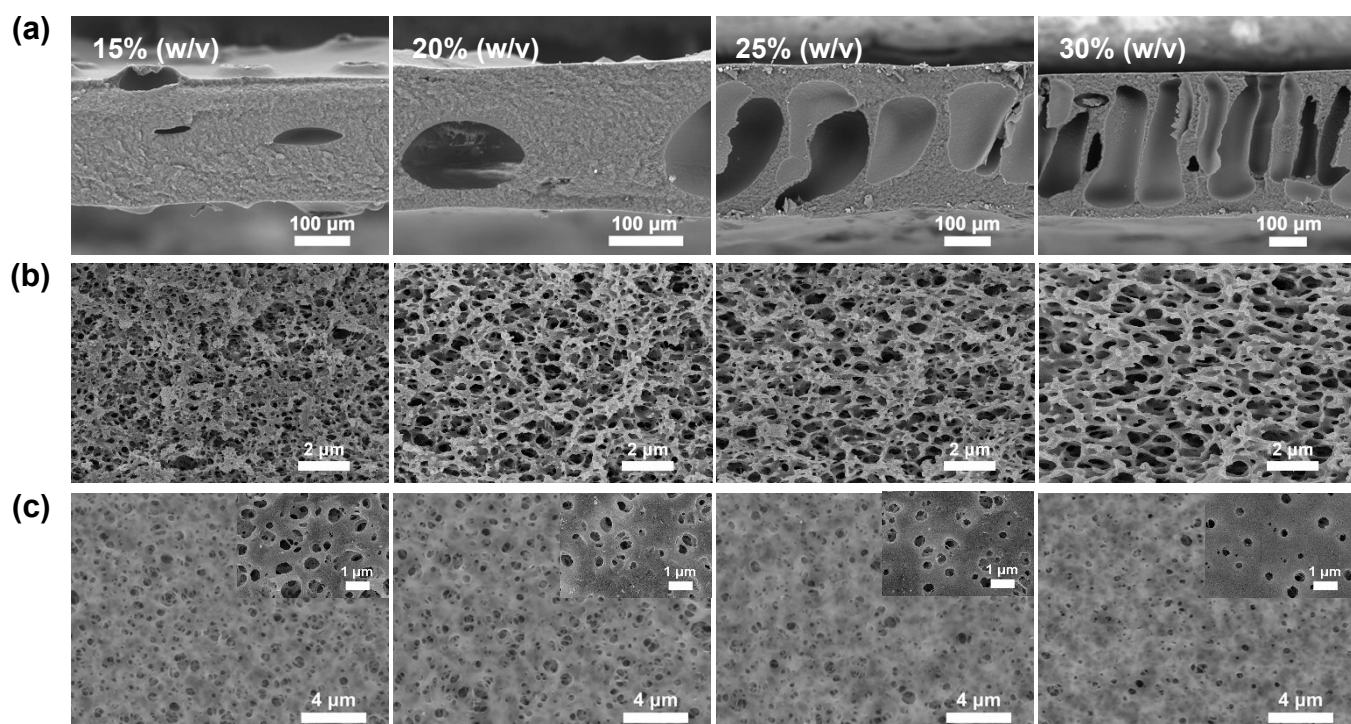

**Fig. S2.** SEM images of the (a, b) cross-sections and (c) surface of RSF films prepared at different  $(\text{NH}_4)_2\text{SO}_4$  concentrations.

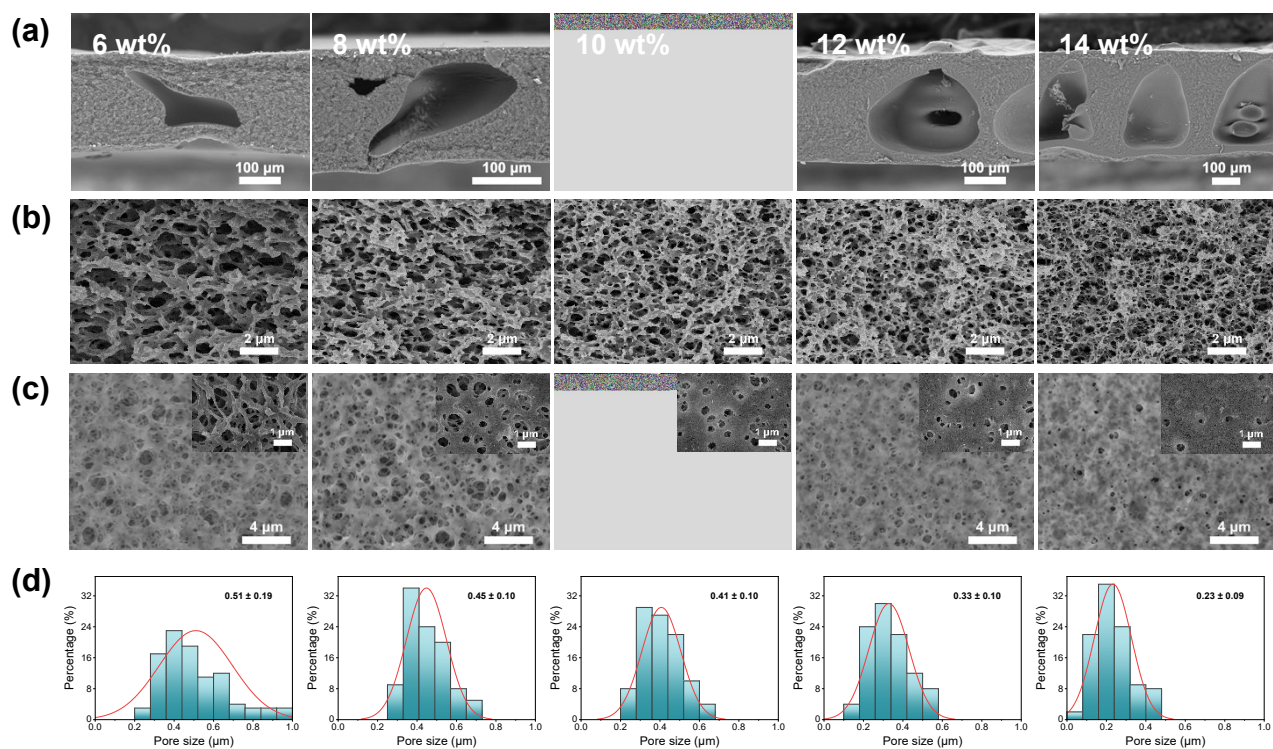

**Fig. S3.** The (a, b) cross-sections and (c) surface SEM images and (d) surface pore size distribution images of RSF films prepared at different SF concentrations with 20% (w/v)  $(\text{NH}_4)_2\text{SO}_4$  solution.

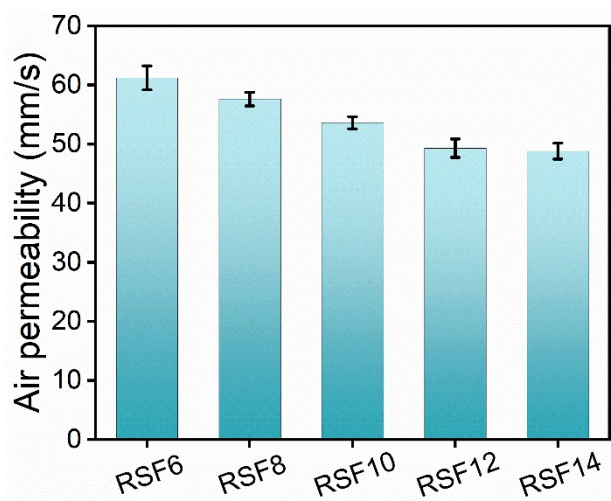

**Fig. S4.** Air permeability of RSF films prepared with various SF concentrations.

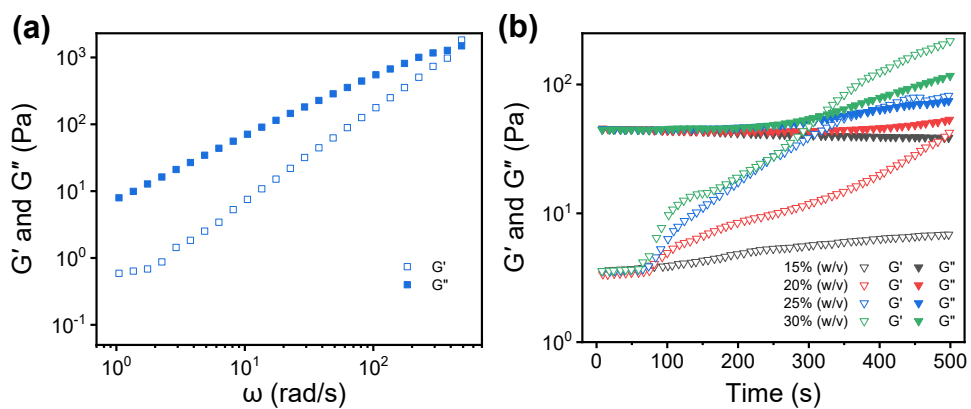

**Fig. S5.** (a) Modulus-angular velocity curves of 10 wt% SF solutions. (b) Time dependence of storage modulus ( $G'$ ) and loss modulus ( $G''$ ) of a 10 wt% SF solution when adding different concentrations of regeneration bath.

**Table S1.** Physical properties of RSF films prepared at different SF concentrations.

| <b>Sample</b> | <b>C<sub>SF</sub><br/>wt%</b> | <b>w<sub>H<sub>2</sub>O</sub><br/>wt%</b> | <b><math>\sigma_b</math><br/>MPa</b> | <b><math>\epsilon_b</math><br/>%</b> | <b>E<br/>MPa</b> | <b>d<br/><math>\mu\text{m}</math></b> | <b>P<br/>%</b> |
|---------------|-------------------------------|-------------------------------------------|--------------------------------------|--------------------------------------|------------------|---------------------------------------|----------------|
| S1            | 6                             | 86.6                                      | 0.22 $\pm$ 0.01                      | 111 $\pm$ 13                         | 0.66 $\pm$ 0.17  | 198                                   | 26.2           |
| S2            | 8                             | 84.2                                      | 0.34 $\pm$ 0.03                      | 133 $\pm$ 14                         | 1.09 $\pm$ 0.19  | 182                                   | 19.6           |
| S3            | 10                            | 82.9                                      | 0.39 $\pm$ 0.02                      | 143 $\pm$ 16                         | 1.51 $\pm$ 0.14  | 199                                   | 14.5           |
| S4            | 12                            | 81.7                                      | 0.37 $\pm$ 0.03                      | 130 $\pm$ 14                         | 1.65 $\pm$ 0.18  | 260                                   | 13.3           |
| S5            | 14                            | 82.4                                      | 0.39 $\pm$ 0.02                      | 120 $\pm$ 14                         | 1.76 $\pm$ 0.09  | 367                                   | 2.4            |

C<sub>SF</sub> and C<sub>(NH<sub>4</sub>)<sub>2</sub>SO<sub>4</sub></sub>: SF and (NH<sub>4</sub>)<sub>2</sub>SO<sub>4</sub> concentrations, respectively; w<sub>H<sub>2</sub>O</sub>: water content;  $\sigma_b$ ,  $\epsilon_b$  and E: tensile strength, elongation at break, and Young' s modulus, respectively; d: Thickness; P: surface porosity.

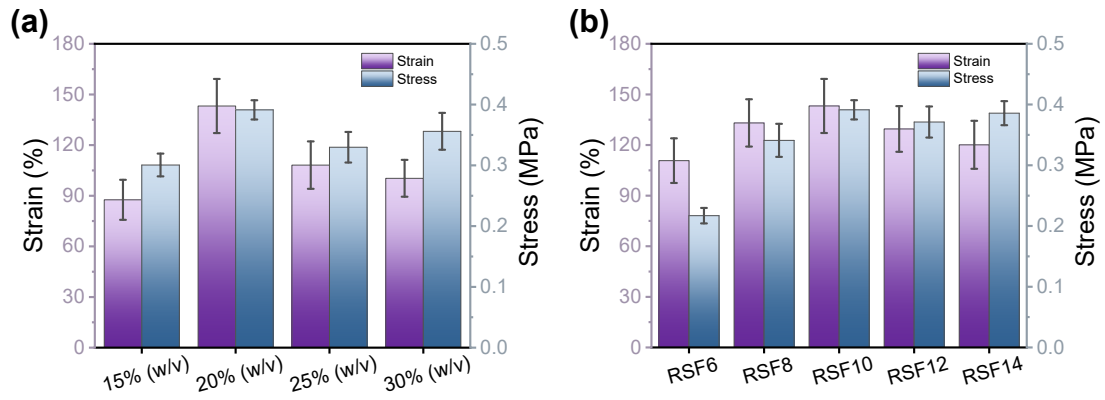

**Fig. S6.** Mechanical properties of wet RSF films prepared (a) at different  $(\text{NH}_4)_2\text{SO}_4$  concentrations ranging from 15% (w/v) to 30% (w/v) and (b) with various SF solution concentrations ranging from 6 wt% to 14 wt%.



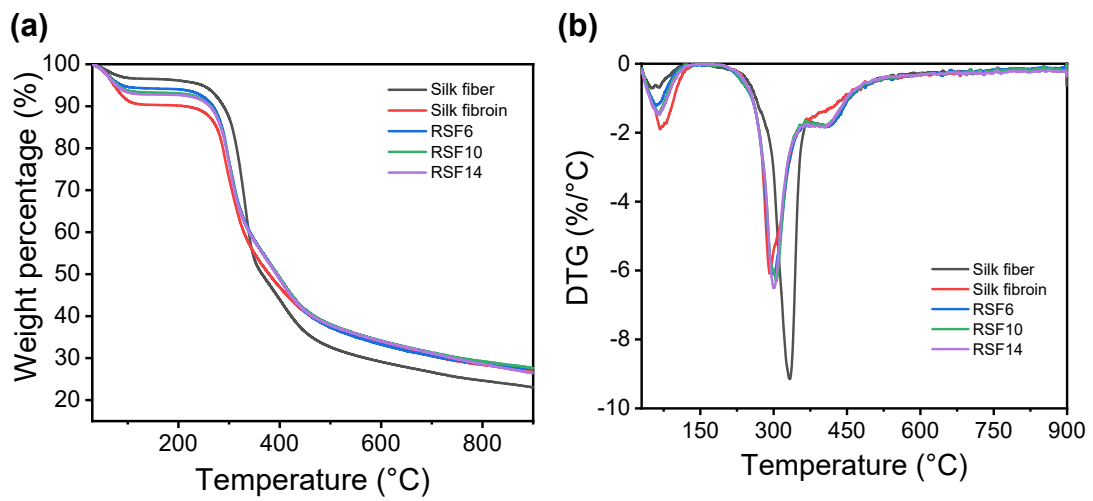

**Fig. S7.** (a) TG and (b) DTG curves of degummed silk fiber, lyophilized silk fibroin, and RSF films.
